# Supplementary material for: Harnessing topological porphyrin frameworks for synergistic H 2 O 2 generation and furfuryl alcohol oxidation
Source: Royal Society of Chemistry journal article supplement (doi:10.1039/d5cc05886d), 2025-11-07
Supplement: d5cc05886d1.pdf [file d5cc05886d1.pdf]

## Supporting Information

### **Harnessing Topological Porphyrin Frameworks for Synergistic H<sub>2</sub>O<sub>2</sub> Generation and Furfuryl Alcohol Oxidation**

Meng-Yu Sun<sup>a,b</sup>, Ben-Hao Liu<sup>a</sup>, Xu-Sheng Wang<sup>c</sup>, Lan Li<sup>d</sup>, Hai-Bo Huang<sup>a,b\*</sup>, Hua Tang<sup>a,b\*</sup>

<sup>a</sup> School of Environmental Science and Geography, Qingdao University, Qingdao, 266071, P.R. China

<sup>b</sup> Shandong Key Laboratory of Synergistic Control of Complex Multi-Media Pollution

<sup>c</sup> State Key Laboratory of Bio-based Fiber Materials, School of Materials Science and Engineering, Zhejiang Sci-Tech University, Hangzhou, 310018, P. R. China

<sup>d</sup> College of Materials and Chemistry, China Jiliang University, Hangzhou, 310018, P.R. China.

\*Corresponding authors. E-mail: hbhuang16@163.com (H.B. Huang); huatang79@163.com (H. Tang).

## **Experimental Section**

### **1. Materials**

Tetrakis (4-Carboxyphenyl) Porphyrin (TCPP) (96%, Adamas), 1,3,5-tris (4-carboxyphenyl) benzene (BTB) (97%, Aladdin), benzoic acid (99%, Sinopharm Chemical Reagent Co., Ltd (SCRC)), acetic acid (AR, SCRC), ammonium acetate (99%, Macklin), N, N-dimethylformamide (DMF) (99%, SCRC), acetonitrile (AR, Shanghai Wokai Biological Technology Co. Ltd.), acetone (99%, SCRC), zirconium chloride (98%, Macklin), potassium iodide (99%, Macklin), potassium hydrogen phthalate (99%, sigmaaldrich). Deionized water was used for all tests and all the reagents were used as received without further purification.

### **2. Synthesis of PCN-134**

The PCN-134 was synthesized via a solvothermal method.  $\text{ZrCl}_4$  (120 mg) and BTB (50mg) were dissolved in 10 mL DMF. Then, poured it into reaction vials, which were sealed and kept at 85 °C for 1 h in an oven. When they were cooled to room temperature, mixed it with 10 mL DMF of TCPP (40 mg) and benzoic acid (1200 mg) dissolved. After that, the reaction vials were sealed and kept at 120°C for 24 h in an oven. When the vials were cooled to room temperature, the power was filtered under vacuum and washed several times with DMF and acetone. Finally, the sample PCN-134 was dried at 60 °C in an oven under vacuum for 6 h.

### **3. Synthesis of PCN-224**

The PCN-224 was synthesized via a solvothermal method.  $\text{ZrCl}_4$  (120 mg), TCPP (40 mg) and benzoic acid (1200 mg) were dissolved in 8 mL of mixed solution of 7.5 mL DMF and 0.5 mL acetic acid, which was continuously ultrasonicated until all the solutes were totally dissolved. After that, the solution was poured into a Teflon autoclave, which was sealed and kept at 120 °C for 24 h in an oven. When the autoclave was cooled to room temperature, the power was filtered under vacuum and washed several times with DMF and acetone. Finally, the sample PCN-224 was dried at 60 °C in an oven under vacuum for 6 h.

#### **4. Characterization**

The morphology and microstructure were studied by field emission scanning electron microscopy (FE-SEM, Sigma500). The UV-visible absorption spectrum (UV-vis) was measured using a Shimadzu UV-2600 spectrometer, and  $\text{BaSO}_4$  was selected as the reference sample. The phase and chemical composition were investigated by X-ray photoelectron spectroscopy was performed on an ESCALAB Xi+ electron spectrometer (Thermo Fisher Scientific, US) using 300 W Al  $K\alpha$  radiation. X-ray diffraction (XRD) and Fourier transform infrared spectroscopy (FT-IR) were obtained Ultima IV and Nicolet iS50. Nitrogen sorption/desorption curves were obtained using ASAP 2020 Plus 2.00. Furthermore, to evaluate the optical and electrochemical performance, we used photoluminescence (PL, FLS 1000), time-resolved photo-luminescence (TR-PL, Edinburgh-FLS-1000) spectra and an electrochemical workstation (CHI-760E) with a three-electrode system. Electron spin

resonance (ESR) was detected on Bruker EMX PLUS using DMPO as radical capture reagent.

## **5. Photoelectrochemical measurements**

Electrochemical measurements were performed on an electrochemical workstation (CHI760E, China) using a standard three-electrode system. Pt sheet electrode and Ag/AgCl electrode were separately used as the counter electrode and reference electrode. The working electrode was prepared by coating with thin sample film on fluorine-doped tin oxide (FTO) conductive glass. Typically, 5 mg of powder sample was dispersed in a mixed solution (250  $\mu$ L ethanol and 30  $\mu$ L Nafion) and sonicated for 30 min. Then the resulting suspension was dip-coated on the FTO surface and dried overnight at room temperature. Transient photocurrents, Mott-Schottky plots tests were carried out by using 0.5 mol/L Na<sub>2</sub>SO<sub>4</sub> (PH=7) solution as the electrolyte. In addition, electrochemical impedance spectroscopy (EIS) measurements use potassium ferricyanide solution as the electrolyte.

## **6. Photocatalytic Preparation of Hydrogen Peroxide**

To quantify photocatalytic H<sub>2</sub>O<sub>2</sub> production, a standard heterogeneous reaction protocol was implemented. A 5 mg aliquot of the photocatalyst was suspended in 50 mL of ultrapure water containing 25  $\mu$ L of furfuryl alcohol (FAL) as the sacrificial electron donor. Atmospheric control was achieved by pre-equilibration of the suspension with either nitrogen or oxygen gas for 30 minutes prior to irradiation. The heterogeneous reaction mixture was subjected to visible light illumination from a 300 W xenon lamp for 3 hours under continuous stirring, with temperature precisely

regulated at 20 °C using a thermostatic circulating water system. Periodic sampling (every 30 minutes) facilitated the monitoring of H<sub>2</sub>O<sub>2</sub> evolution. The analytical determination of H<sub>2</sub>O<sub>2</sub> involved a validated iodometric assay: a 0.5 mL sample was reacted with 0.5 mL of 0.4 mol/L Potassium iodide (KI) and 0.5 mL of 0.1 mol/L Potassium hydrogen phthalate (KHP) in darkness for 30 minutes. The absorbance of the liberated iodine was subsequently quantified at 351 nm using UV-DRS spectroscopy (Fig. S4a), and concentrations were derived from a linear standard calibration curve (Fig. S4b-c).

## **7. Photocatalytic Preparation of Furfuryl Alcohol Oxidation**

The quantitative analysis of the oxidation products including furoic acid and furfural were carried out by high-performance liquid chromatograph (HPLC). 10 µL of liquid was obtained at 0, 1, 2 and 3 h and analyzed by the HPLC (LC20AD, Shimadzu, Japan) with a UV-vis detector (SPD-20A, Shimadzu, Japan) and 5 µm C18 column. The mobile phase consisted of acetonitrile (chromatographic grade purity) and 5 mM ammonium acetate aqueous solution (volume ratio is 4:6) and the flow rate was 0.8 mL/min. In addition, the detection wavelength is set at 230 nm.

## **8. Degradation experiment of Hydrogen Peroxide**

To investigate catalyst stability and interaction within a hydrogen peroxide milieu, a 5 mg quantity of the catalyst was dispersed in 50 mL of a 1 mmol/L H<sub>2</sub>O<sub>2</sub> aqueous solution. Prior to analysis, the heterogeneous suspension was thoroughly degassed under an inert nitrogen atmosphere for 30 minutes, ensuring the absence of atmospheric oxygen. Subsequently, the sealed reaction vessel was subjected to full

spectrum irradiation. Temporal changes in H<sub>2</sub>O<sub>2</sub> concentration were monitored at 30-minute intervals via an appropriate analytical technique.

## 9. Apparent quantum Efficiency (AQE) calculation

To calculate the apparent quantum yield (AQE), different incident lights were used as the source to trigger the photocatalytic reaction. We have calculated the AQE for the reaction under monochromatic light irradiation at 400, 475 and 600 nm. The detailed calculation method has been added to the following formulae, and the AQE values have been incorporated into Fig.S9. The results demonstrate that PCN-224 achieves an AQE of 0.22% at 475 nm.

$$N = \frac{E\lambda}{hc}$$

$$AQE = \frac{2 \times \text{the number of evolved } H_2O_2}{\text{the number of incident photons}} \times 100 \%$$

h: Represents the Planck constant.  $h \approx 6.626 \times 10^{-34} \text{ J}\cdot\text{s}$

$\lambda$ : The wavelength representing light waves

c: Represents the speed of light in a vacuum

S1

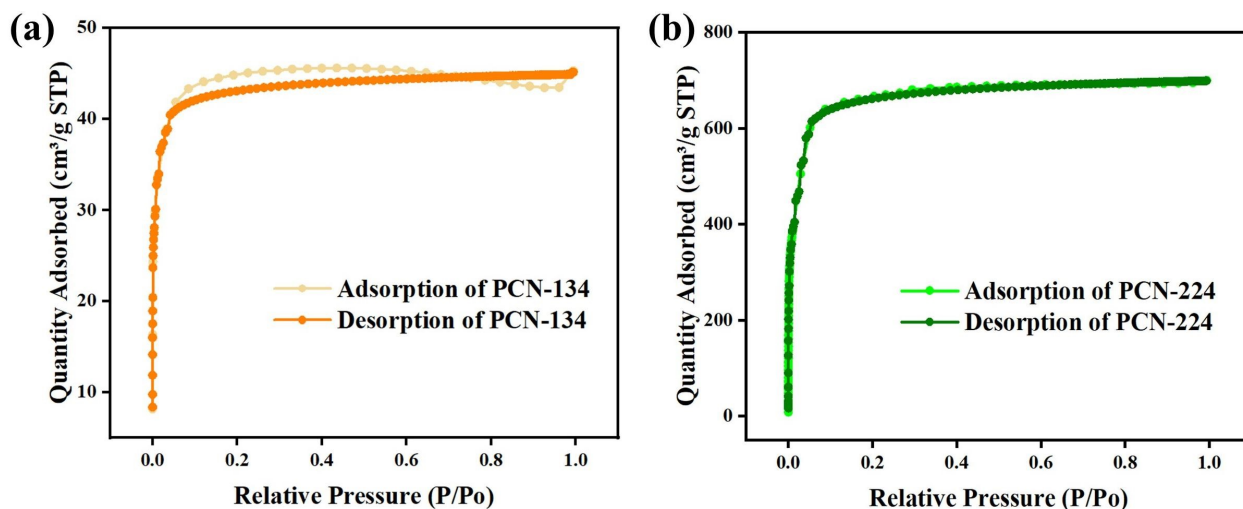

Fig. S1 Comparison of the N<sub>2</sub> adsorption-desorption isotherms of PCN-134 and PCN-224.

S2

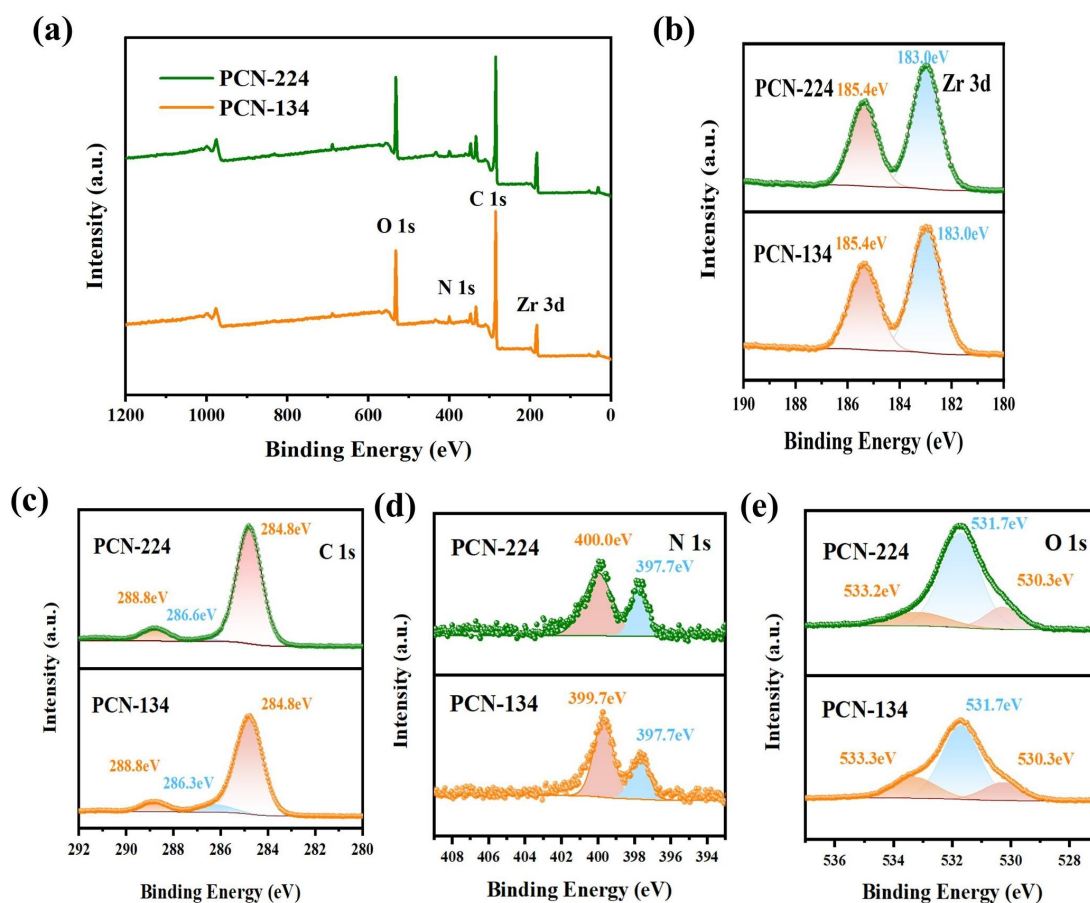

Fig. S2 Comparison of the XPS (a), XPS-Zr (b), XPS-C (c), XPS-N (d) and XPS-O (e) spectra of PCN-134 and PCN-224.

S3

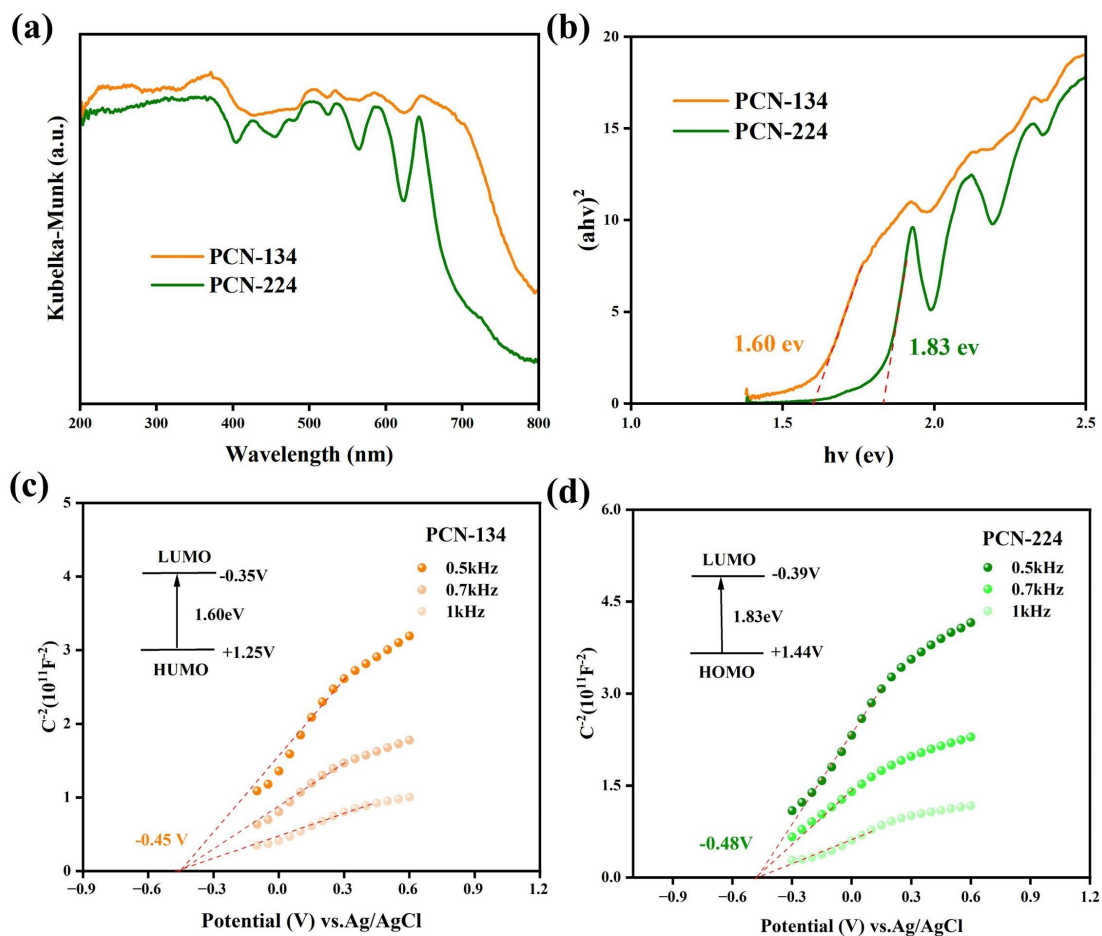

Fig. S3 (a) UV-vis absorption spectra and (b) Tauc plots of PCN-134 and PCN-224; (c-d) Mott-Schottky plots of PCN-134 and PCN-224.

S4

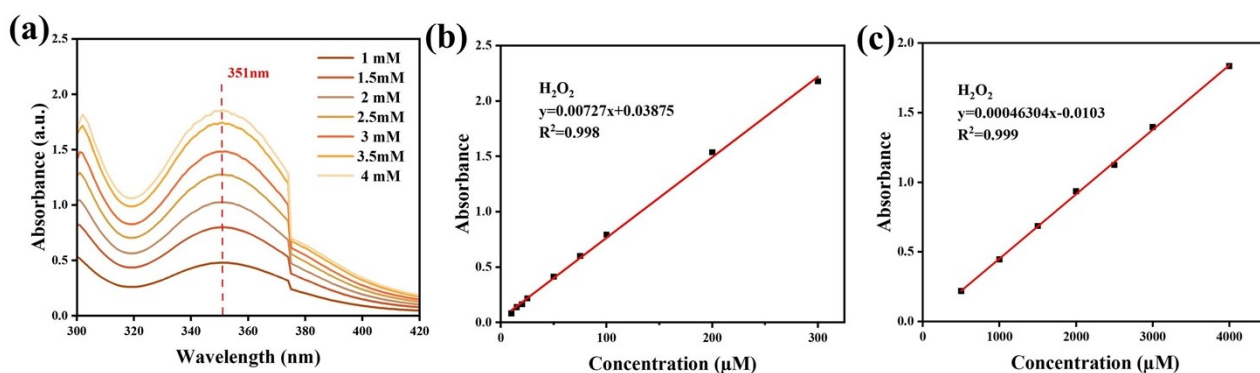

Fig. S4 (a) Absorbance curves at different  $H_2O_2$  concentrations; (b-c) Calibration curve for quantifying photocatalytic  $H_2O_2$  yields.



S5

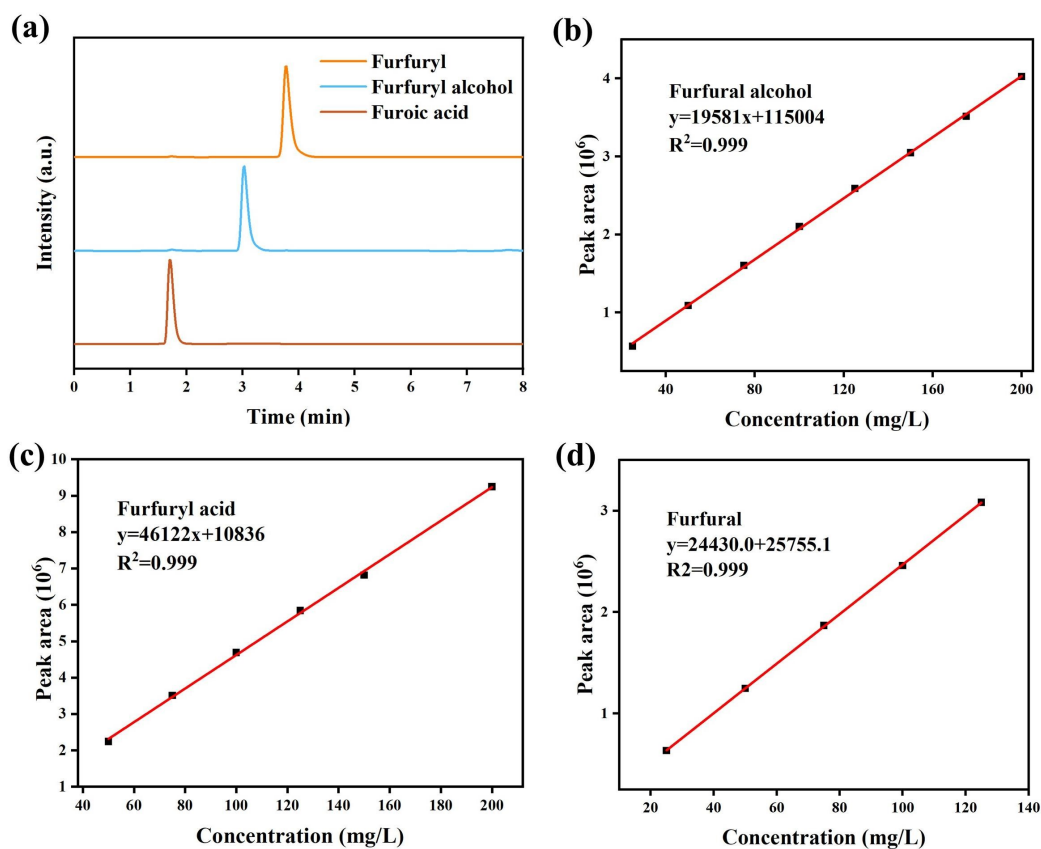

Fig. S5 (a) HPLC chromatograms of furfuryl alcohol, furfural and furoic acid at optimized reaction condition; (b) The standard curve for the calibration of furfuryl alcohol concentration; (c) The standard curve for the calibration of furfural concentration; (d) The standard curve for the calibration of furoic acid concentration.

S6

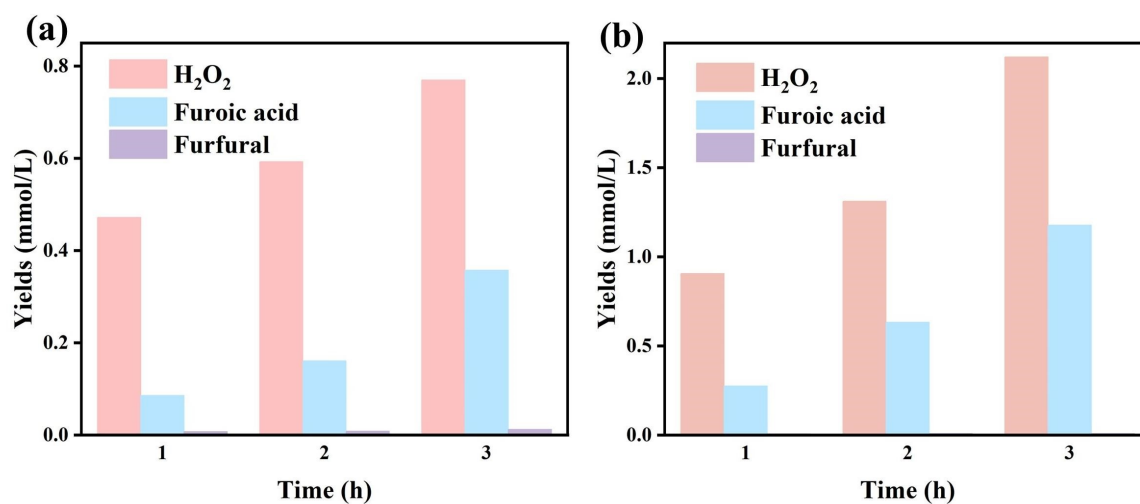

Fig. S6 Times course of  $H_2O_2$ , FF, FAC over PCN-134 and PCN-224 in 3 h.

S7

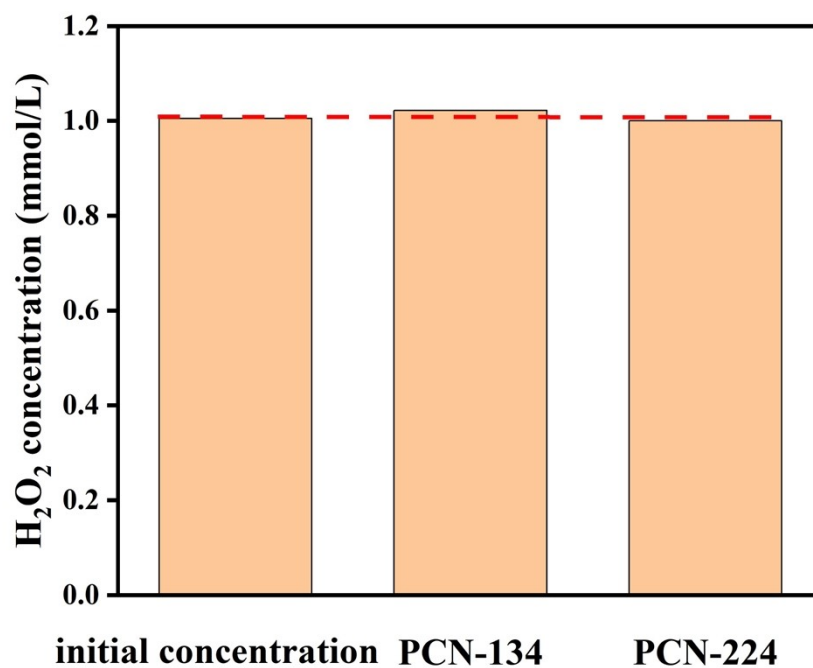

Fig. S7 The decomposition experiment of  $\text{H}_2\text{O}_2$  under dark conditions

S8

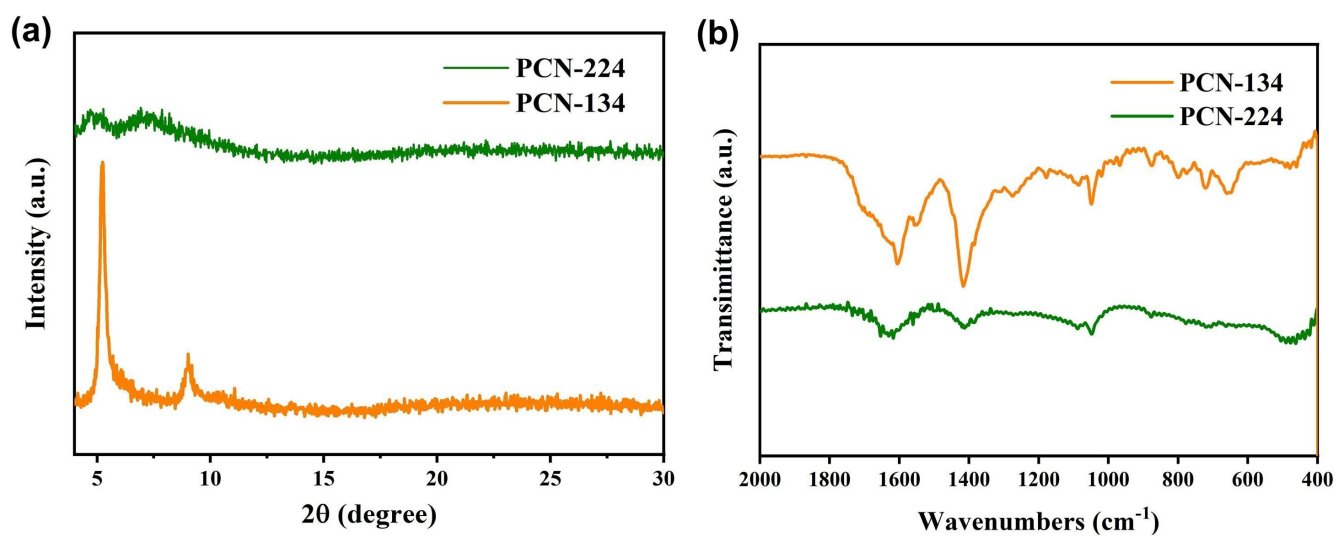

Fig. S8 (a) The XRD and FTIR spectra of PCN-134 and PCN-224 after the reaction.

S9

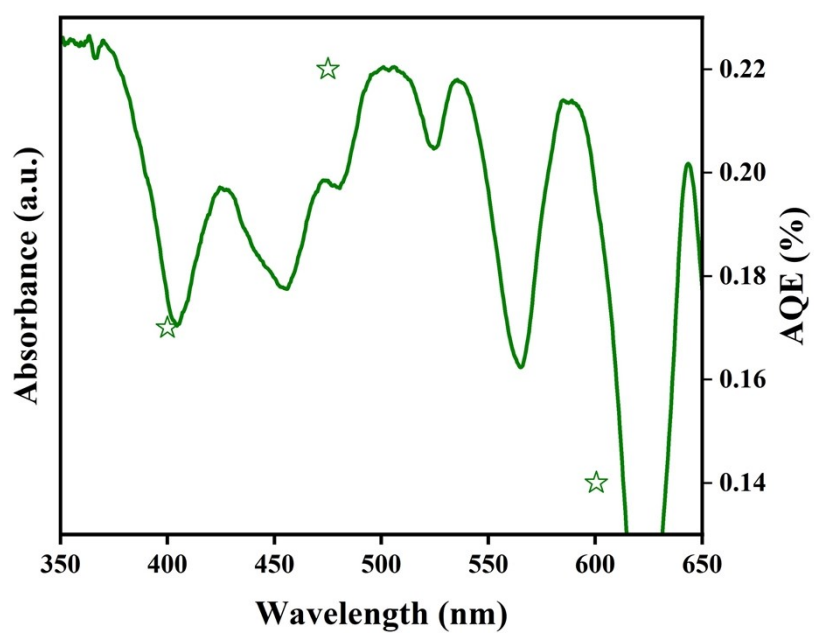

Fig. S9 UV-Vis of PCN-224 and the wavelength dependence of AQE

S10

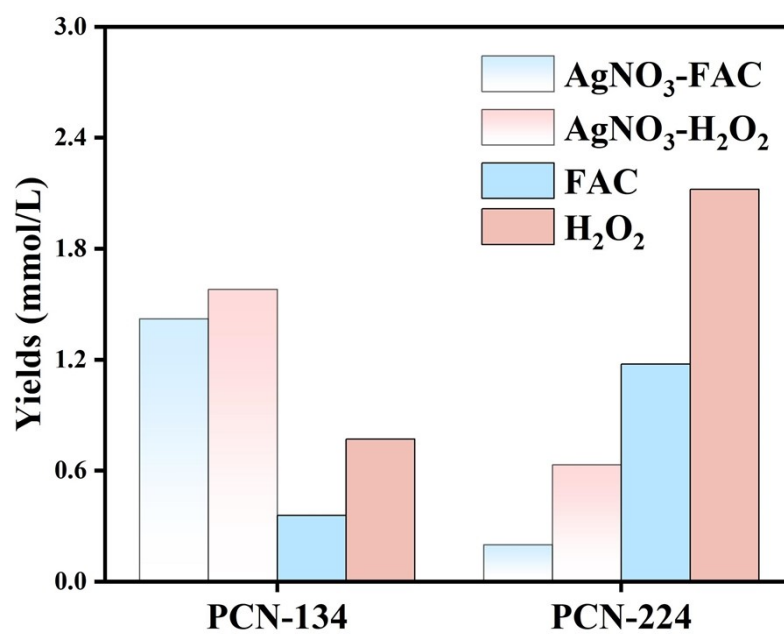

Fig. S10 Yields of H<sub>2</sub>O<sub>2</sub> and Furoic acid over PCN-134 and PCN-224 after 3 h, with adding AgNO<sub>3</sub> and no scavenger.

**Table S1.** Calculated FAL conversion and product selectivity over PCN-134 and PCN-224.

| Sample  | Time(h) | Conv. (%) | Sel. of FAC (%) | Sel. of FF (%) |
|---------|---------|-----------|-----------------|----------------|
| PCN-134 | 3       | 30        | 21              | 0.6            |
| PCN-224 | 3       | 60        | 33              | 0.2            |

**Table S2.** Fitting parameters and average lifetimes ( $\tau_{\text{Avg}}$ ) over PCN-134 and PCN-224.

$$\tau_{\text{avg}} = (A_1 \tau_1^2 + A_2 \tau_2^2) / (A_1 \tau_1 + A_2 \tau_2)$$

| Sample  | $\tau_1$ | $A_1$     | $\tau_2$ | $A_2$    | $\tau_{\text{avg}}$ |
|---------|----------|-----------|----------|----------|---------------------|
| PCN-134 | 0.7141   | 1532.6136 | 3.0320   | 115.4619 | 1.276               |
| PCN-224 | 0.6800   | 1570.3964 | 3.0379   | 108.2939 | 1.235               |

**Table S3. Comparing the photocatalytic performance of H<sub>2</sub>O<sub>2</sub> production with other photocatalysts.**

| photocatalysts            | Sacrificial    | Solution              | H <sub>2</sub> O <sub>2</sub> | Reference |
|---------------------------|----------------|-----------------------|-------------------------------|-----------|
| PCN-224                   | 30             | Water                 | 9.04mmol/g/                   | This work |
| NH <sub>2</sub> -MIL-125- | No             | Water                 | 101μmol/g/h                   | 1         |
| NH <sub>2</sub> -UiO-     | EtOH           | Water                 | 243μmol/g/h                   | 2         |
| UiO-66-NH <sub>2</sub>    | benzyl alcohol | acetonitrile          | 67.2mmol/g/                   | 3         |
| MIL-125-PDI               | No             | acetonitrile          | 4800μmol/g/                   | 4         |
| EZUNH-2 MOF               | IPA            | Water                 | 35.2μmol/L                    | 5         |
| OPAF <sub>e</sub> -Zr-mof | benzyl alcohol | Water                 | 13.1mmol/g/                   | 6         |
| NH <sub>2</sub> -MIL-125  | TEOA           | MeCN/H <sub>2</sub> O | 925.8μmol/h                   | 7         |
| Re10-MFM-67               | benzyl alcohol | BzOH/Water            | 8.50mmolgc                    | 8         |

1. Y. Zhang, Z. Luo, T. Zhou, H. Huang and H. Tang, *Chem. Commun.*, 2024, **60**, 1920-1923.
2. L. Li, X. Wang, H.-X. Liu, S.-S. Xia, Z. Chen and J. Ye, *J. Catal.*, 2024, **429**, 115249.

3. L. Yuan, Y. Zou, L. Zhao, C. Zhang, J. Wang, C. Liu, G. Wei and C. Yu, *Appl. Catal., B*, 2022, **318**, 121859.
4. X. Chen, Y. Kondo, S. Li, Y. Kuwahara, K. Mori, D. Zhang, C. Louis and H. Yamashita, *J. Mater. Chem. A*, 2021, **9**, 26371-26380.
5. S. Dash, S. P. Tripathy, S. Subudhi and K. Parida, *Ind. Eng. Chem. Res.*, 2025, **64**, 5841-5853.
6. X. Chen, Y. Kuwahara, K. Mori, C. Louis and H. Yamashita, *ACS Appl. Energy Mater.*, 2021, **4**, 4823-4830.
7. X.-Y. Ji, Y.-Y. Wang, Y. Li, K. Sun, M. Yu and J. Tao, *Nano Res.*, 2022, **15**, 6045-6053.
8. B. Tang, D. Brooks, M. He, Y. Chen, Z. Hu, X. Han, J. Li, S. Zhou, J. Fan, Y. Ye, I. da Silva, C. Li, Z. Wang, L. Shan, B. Han, W. Li, D. Polyukhov, B. An, C. Dejoie, M. Wilding, S. Xu, M. Kippax-Jones, Z. Zhu, Y. Ma, F. Tuna, E. J. L. McInnes, S. J. Day, S. P. Thompson, M. D. Frogley, L. S. Natrajan, M. Schröder and S. Yang, *J. Am. Chem. Soc.*, 2025, **147**, 24326-24335.
